# Supplementary material for: Polymer-Bioactive Glass Composite Filaments for 3D Scaffold Manufacturing by Fused Deposition Modeling: Fabrication and Characterization
Source: PubMed Central journal article supplement (PMC7326953; doi:10.3389/fbioe.2020.00552), 2020-06-24
Supplement: Data_Sheet_1.pdf [file Data_Sheet_1.pdf]

# Polymer-Bioactive Glass Composite Filaments for 3D Scaffold Manufacturing by Fused Deposition Modelling: Fabrication and Characterization

Thomas Distler<sup>1</sup>, Niklas Fournier<sup>1</sup>, Alina Grünewald<sup>1</sup>, Christian Polley<sup>2</sup>, Hermann Seitz<sup>2</sup>, Rainer Detsch<sup>1</sup>, Aldo R. Boccaccini<sup>1,2\*</sup>

<sup>1</sup>Institute of Biomaterials, Department of Materials Science and Engineering, Friedrich-Alexander-University Erlangen-Nuremberg, Erlangen, Germany

<sup>2</sup>Chair of Microfluidics, Faculty of Mechanical Engineering and Marine Technology, University of Rostock, Rostock, Germany

**\* Correspondence:**

Prof. Dr. Aldo R. Boccaccini

aldo.boccaccini@ww.uni-erlangen.de

## Supplementary Information

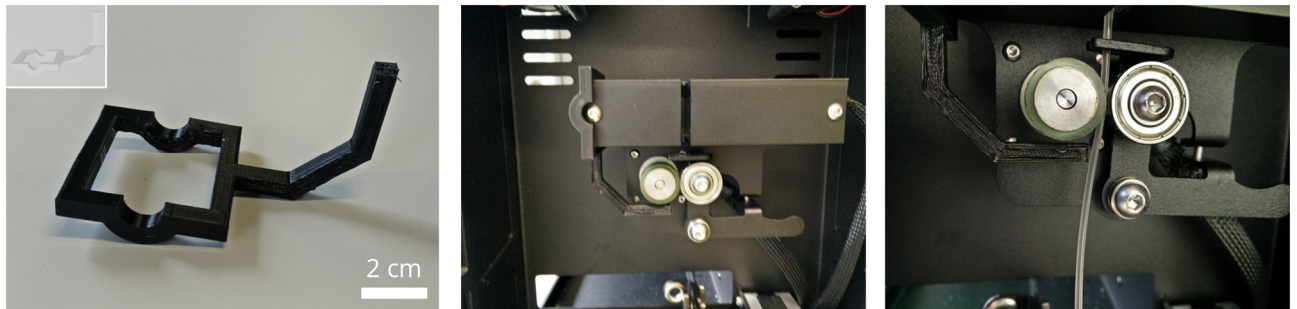

**SUPPLEMENTARY FIGURE 1** | Support structure to avoid filament adhesion and coiling on the puller wheels (right image) for 3Devo NEXT Filament maker. CAD \*.stl file available for download in the supporting information.

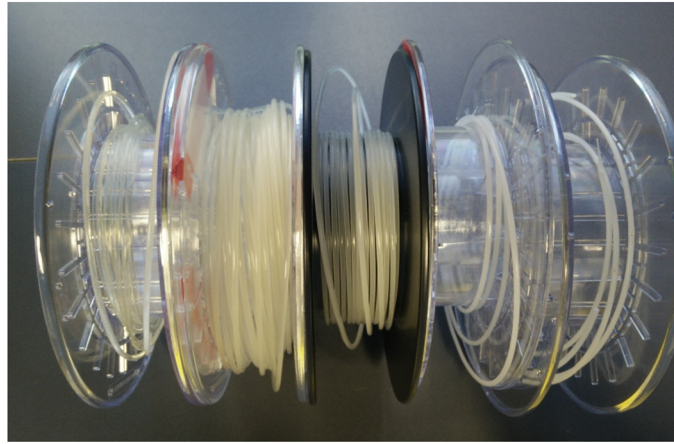

**SUPPLEMENTARY FIGURE 2** | Spooled filaments of PLA-BG with different bioglass content. From left to right: PLA, PLA-1%BG, PLA-2.5%BG, PLA-5%BG, PLA-10%BG.

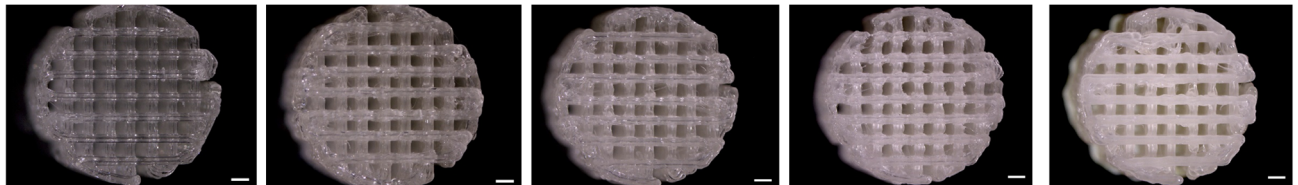

**SUPPLEMENTARY FIGURE 3** | Light microscopy images of PLA-BG scaffolds with 0%, 1%, 2.5%, 5% and 10% (w/v) Bioglass (left to right). Scale bar: 1 mm.

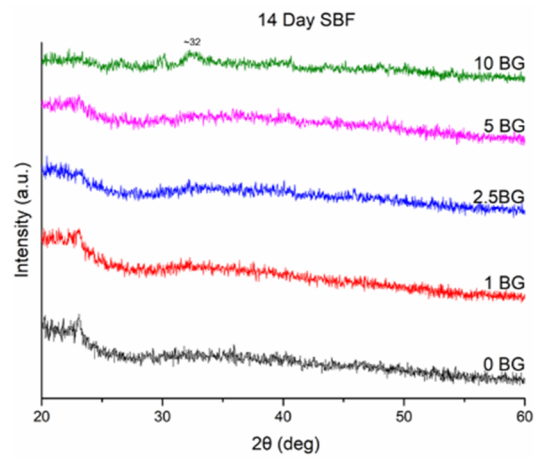

**SUPPLEMENTARY FIGURE 4** | X-ray diffraction analysis (XRD) of PLA-BG squares after 14 days of incubation in SBF. Peak development at  $\sim 32^\circ$   $2\theta$  indicating crystallinity for PLA-10% (wt)BG composition of highest BG content.

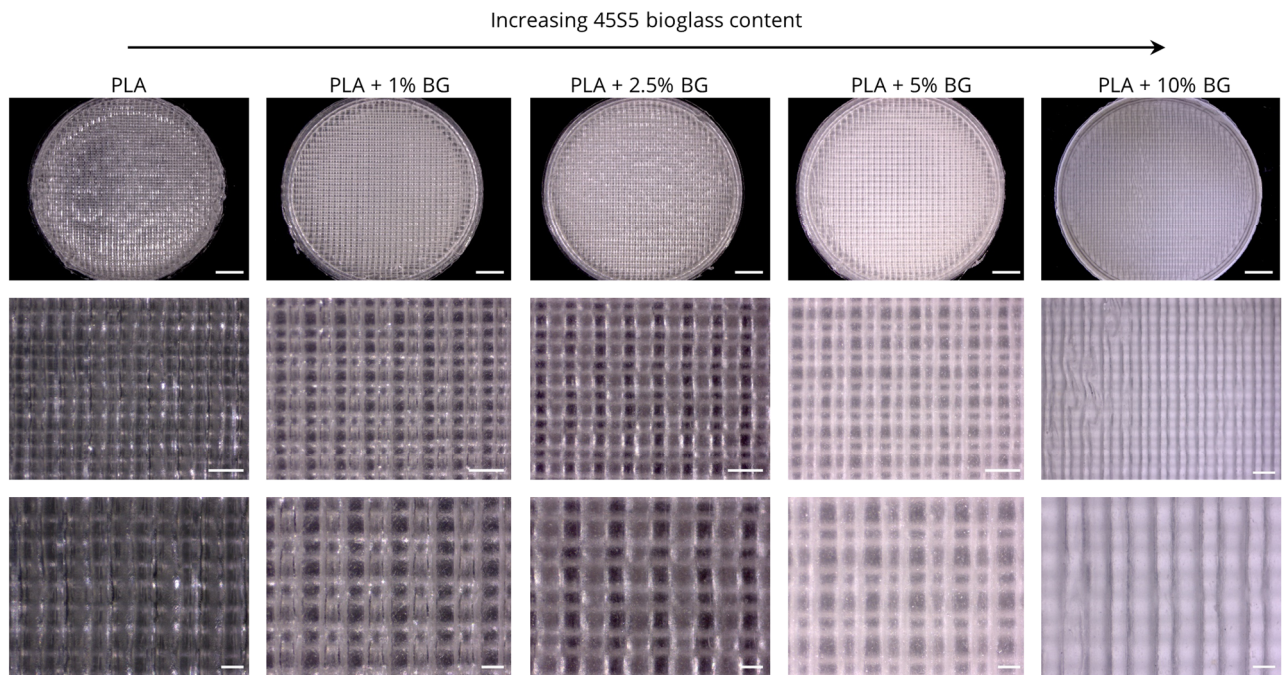

**SUPPLEMENTARY FIGURE 5** | 3D printed PLA-BG discs for in-vitro biocompatibility assessment. Light microscopy images illustrating patterned surface of 3D FDM printed PLA-BG discs; scale bars: 2000  $\mu\text{m}$  (top row), 500  $\mu\text{m}$  (mid row), 200  $\mu\text{m}$  (bottom row).

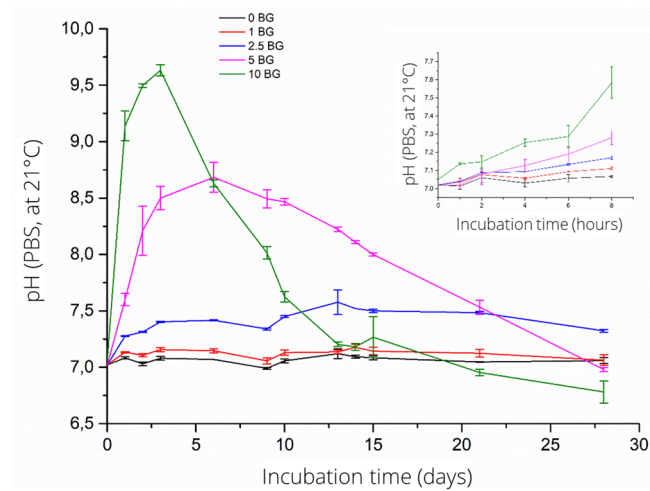

**SUPPLEMENTARY FIGURE 6** | 3D printed PLA-BG discs immersed in PBS at 37°C for different time points. pH development depicted with rapid pH increase for 5% and 10% (wt) BG containing PLA associated to BG dissolution.

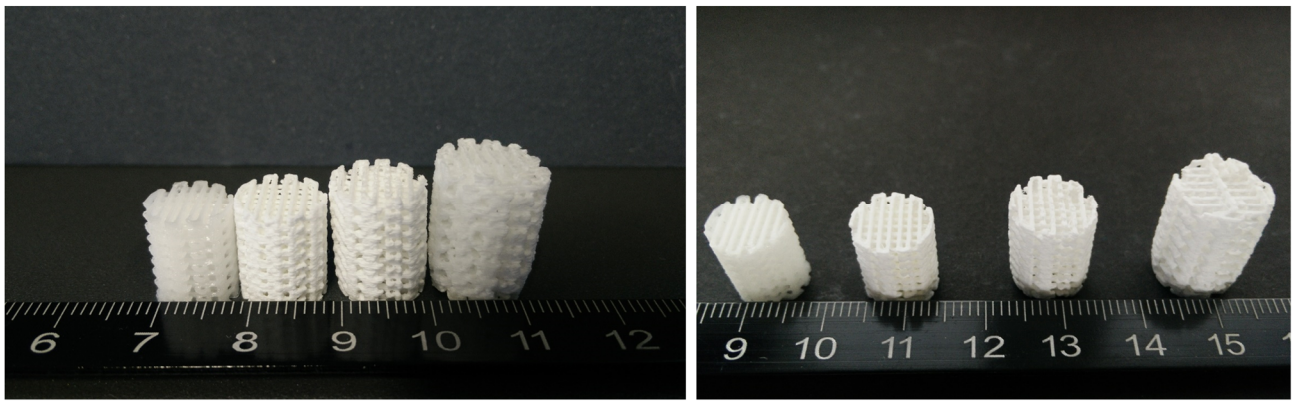

**SUPPLEMENTARY FIGURE 7** | 3D printed PLA-BG scaffolds incubated in PBS for 28 days. From left to right: PLA, PLA-1%BG, PLA-2.5%BG, PLA-5%BG scaffolds. Scaffold swelling is indicated with increasing bioglass content.

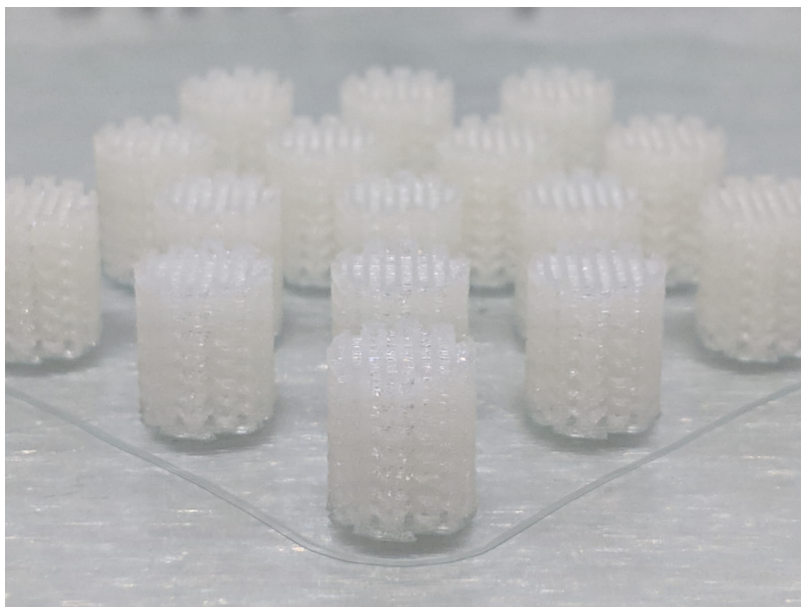

**SUPPLEMENTARY FIGURE 8** | Simultaneous manufacturing of sixteen PLA-BG scaffolds in one print using the 3D printer

**Supplementary TABLE S1** | Printing parameter details for producing PLA-BG scaffolds.

| <b>Parameter</b>                       | <b>Value</b> |
|----------------------------------------|--------------|
| <i>Print core</i>                      | 0.25         |
| <i>Ahesion type</i>                    | Skirt        |
| <i>Layer height</i>                    | 0.2          |
| <i>Layer height 0</i>                  | 0.1          |
| <i>Prime tower enable</i>              | False        |
| <i>Position</i>                        | 0            |
| <i>Bottom layers</i>                   | 5            |
| <i>Infill overlap</i>                  | 0            |
| <i>Infill pattern</i>                  | Lines        |
| <i>Infill sparse density</i>           | 100          |
| <i>Initial layer line width factor</i> | 100          |
| <i>Line width</i>                      | 0.4          |
| <i>Material flow</i>                   | 100          |
| <i>Material print temperature</i>      | 160          |
| <i>Build plate temperature</i>         | 55           |
| <i>Retraction hop enabled</i>          | false        |
| <i>Speed layer 0</i>                   | 25           |
| <i>Speed print</i>                     | 30           |
| <i>Speed topbottom</i>                 | 25           |
| <i>Speed travel</i>                    | 100          |
| <i>Speed travel layer 0</i>            | 100          |
| <i>Speed wall</i>                      | 25           |
| <i>Speed wall 0</i>                    | 25           |
| <i>Top layers</i>                      | 5            |
| <i>Wall line count</i>                 | 1            |
| <i>Wall thickness</i>                  | 0.7          |
| <i>Generate support</i>                | false        |

**SUPPLEMENTARY Table S2** | PCR primers used and genes investigated in qRT-PCR analysis.

| <b>Gene</b>   | <b>Gene name</b>                                         | <b>PrimePCR Assay ID</b> | <b>Gen Bank No.</b> |
|---------------|----------------------------------------------------------|--------------------------|---------------------|
| <i>COL1A1</i> | collagen type I (col I)                                  | qHsaCED0043248           | NG_007400.1         |
| <i>VEGFA</i>  | vascular endothelial growth factor A (vegfa)             | qHsaCED0043454           | NG_008732.1         |
| <i>BGLAP</i>  | bone gamma-carboxyglutamate protein (bglap, osteocalcin) | qHsaCED0038437           | NT_004487.20        |
| <i>RUNX2</i>  | runt-related transcription factor 2 (runx2)              | qHsaCID0006726           | NG_008020.1         |
| <i>ALPL</i>   | alkaline phosphatase (alp)                               | qHsaCID0010031           | NC_000001.10        |
| <i>GAPDH</i>  | glyceraldehyde-3-phosphate dehydrogenase                 | qHsaCED0038674           | NC_000012.11        |
| <i>YWHAZ</i>  | 14-3-3-zeta                                              | qHsaCID0013897           | NC_000008.10        |
| <i>HPRT1</i>  | hypoxanthine phosphoribosyltransferase 1                 | qHsaCID0016375           | NC_000023.10        |
